# Supplementary material
Source: PubMed Central journal article supplement (PMC7263454)
Supplement: ehp6301.s001.acco.pdf [file ehp6301.s001.acco.pdf]

**Note to readers with disabilities:** *EHP* strives to ensure that all journal content is accessible to all readers. However, some figures and Supplemental Material published in *EHP* articles may not conform to [508 standards](#) due to the complexity of the information being presented. If you need assistance accessing journal content, please contact [ehp508@niehs.nih.gov](mailto:ehp508@niehs.nih.gov). Our staff will work with you to assess and meet your accessibility needs within 3 working days.

### **Supplemental Material**

#### **A Combined Morphometric and Statistical Approach to Assess Nonmonotonicity in the Developing Mammary Gland of Rats in the CLARITY-BPA Study**

Maël Montévil, Nicole Acevedo, Cheryl M. Schaeberle, Manushree Bharadwaj, Suzanne E. Fenton, and Ana M. Soto

#### **Table of Contents**

**Table S1.** Semi-quantitative scoring guideline used for morphological assessment of PND 21 and PND 90 mammary gland development in whole mounts following early life BPA or EE2 exposures.

**Table S2.** Features measured by the automatic method applied to PND 21 mammary glands and complementary quantities used jointly in PCA and other analyses.

**Table S3.** Comparison of the test variable in the data,  $X_{\text{observed}}$ , and the statistics resulting from the permutation test for different values of the criteria A and B with datasets PND90CD, PND90SD, 6MCD and 6MSD.

**Table S4.** Mean and standard deviation of conditions compared in the main text, in PND90CD, PND90SD, 6MCD and 6MSD. Number of animals per group n=8-10.

**Table S5.** Incidence of benign and malignant lesions/tumors identified from A) PND 90 and B) 6-month mammary glands following either continuous or stop-dose exposures across all treatment groups.

**Figure S1.** Scoring evaluation of PND21P mammary glands. [A] *Comparison of the mean semi-quantitative score of all treatment groups.* Control: vehicle control, EE2: ethinyl estradiol, BPA: bisphenol A. Units:  $\mu\text{g}/\text{kg}$  body weight (bw)/day. Number of animals per group n=9-12. \* indicates significantly accelerated gland development compared to vehicle controls (Kruskal Wallis;  $p=0.004$  and  $p<0.0001$ ). Images are representative of mammary gland development in [B] PND21P vehicle control group, [C] PND21P EE2 0.5 group, and [D] PND21P EE2 5.0 group.

**Figure S2.** *Simulated dose response with  $a=0.6$  (without correlations).* The midline represents the median, the box represents the quartiles above and below the median and the whiskers represent the two other quartiles, excluding outliers. A: We represent a simulation with 10000 “animals” per group to show the shape of our simulated distribution. B: several iterations of our simulated distribution with the usual 10 animal per group.

**Figure S3.** *Effect of BPA on body weight and on mammary gland weight in PND21C.* Control: vehicle control, BPA: bisphenol A. Units:  $\mu\text{g}/\text{kg}$  body weight (bw)/day. The midline represents the median, the box represents the quartiles above and below the median and the whiskers represent the two other quartiles, excluding outliers. Number of animals per group  $n=8-10$ .

**Figure S4.** *Semiquantitative scoring of postnatal day 90 pilot (PND90P) glands.* Control: vehicle control, EE2: ethinyl estradiol, BPA: bisphenol A. Units:  $\mu\text{g}/\text{kg}$  body weight (bw)/day. A) PND90P animals from Fenton group in which the majority of animals were in estrus at necropsy (only females in estrus included;  $n=7, 10, 10, 4, 6, 4, 4$ ; from left to right). \* Indicates significantly accelerated gland development compared to vehicle controls (Kruskal Wallis; BPA 2.5  $p=0.05$ , EE5  $p=0.01$ ). # Indicates increased gland proliferation that did not reach significance (Kruskal Wallis; BPA 25  $p=0.09$ , EE0.5  $p=0.1$ ). B) PND90P animals that were cycling from both Fenton and Soto groups, with all estrous cycle stages at necropsy included except anestrus ( $n=12, 18, 14, 10, 12, 12, 15$ , from left to right). All animals in A were included in B analysis.

**Figure S5.** *Dimension 1 to 3 from PCA of PND21C animals with (top) and without (bottom) EE2 treatments.* Control: vehicle control, EE2: ethinyl estradiol, BPA: bisphenol A. Units:  $\mu\text{g}/\text{kg}$  body weight (bw)/day. We represent the average of each exposure group. Number of animals per group  $n=8-10$ .

**Figure S6.** *Comparison of the changes between consecutive doses for the 94 features in PND21C described in Table S 2.* Vehicle: vehicle control, BPA: bisphenol A. Units:  $\mu\text{g}/\text{kg}$  body weight (bw)/day. Largest consecutive changes meeting criterion  $B(0.5)$  for each observed feature in PND21C. All consecutive differences are normalized to a maximum of 1, in yellow. No data means that the criterion  $B(0.5)$  is not met for a given feature and consecutive concentration.

**Figure S7.** *Estimated type 1 error rates on data generated by simulation (0.05 in black, 0.01 in blue, 0.005 in red).* A, C; the different variables are not correlated by construction. B,D: the different variables are correlated with coefficients stemming from our data. A, B: Type 1 error rate as a function of the threshold for criterion  $B(p_{\text{thr}})$ , with 20 variables. C, D: Type 1 error rate as a function of the number of features observed for  $p_{\text{thr}}=0.5$ .

**Figure S8.** *Estimated type 2 error rates on data generated by simulation (0.05 in black, 0.01 in blue, 0.005 in red).* A, C, E: the different variables are not correlated by construction. B,D,F: the different variables are correlated with coefficients stemming from our data. A, B: type 2 error rate as a function of the threshold for criterion  $B(p_{\text{thr}})$ , with 20 variables and  $a=0.6$  which is an intermediate value. C,D: type 2 error rate as a function of  $a$  with  $N=20$ . E, F: type 2 error rate as a function of the number  $N$  of variables describing each individual with  $a=0.6$ , and  $p_{\text{thr}}=0.5$ .

**Figure S9.** *Graphical tests to assess the quality of the regressions in PND21 animals.* Control: vehicle control, BPA: bisphenol A. Units:  $\mu\text{g}/\text{kg}$  body weight (bw)/day. The method is provided by the lm method in cran R. The first graph, Residual versus Fitted assesses the presence of a pattern not taken into account by the model and homoscedasticity (i.e., that variance is constant). The second graph assesses the normality of residuals. The third graph is used to assess homoscedasticity. The fourth graph aims at assessing the presence of outliers. Last, the fifth graph displays a box plot of the data and the fitted model. The midline represents the median, the box represents the quartiles above and below the median and the whiskers represent the two other quartiles, excluding outliers. The features represented are A sd width 3D, B Thickness, C Fractal dimension in 3D, D Angle between beginning and end (here, the pattern does not fit the model completely), E Dim.3 resulting from PCA and F Aspect ratio.

**Figure S10.** *Graphical tests to assess the quality of the regressions in 90 day and 6 month animals.* The method is provided by the lm method in cran R. The first graph, Residual versus Fitted, assesses the presence of a pattern not taken into account by the model and homoscedasticity (i.e., that variance is constant). The second graph assesses the normality of residuals. The third graph is used to assess homoscedasticity. The fourth graph aims at assessing the presence of outliers. Last, the fifth graph displays a box plot of the data and the fitted model. The midline represents the median, the box represents the quartiles above and below the median and the whiskers represent the two other quartiles, excluding outliers. The features represented are A Mammary gland weight in PND90SD, B Density in area 3 in PND90CD, C Density in area 3 in 6MCD and D Density in area 3 in 6MSD.

**Table S1.** Semi-quantitative scoring guideline used for morphological assessment of PND 21 and PND 90 mammary gland development in whole mounts following early life BPA or EE2 exposures.

| Age (PND) | Score | Criterion Used in Semiquantitative Scoring                                                                                                                                                                                                |
|-----------|-------|-------------------------------------------------------------------------------------------------------------------------------------------------------------------------------------------------------------------------------------------|
| 21        | 1     | Poor development, small epithelial growth, minimal branching and budding, few/no TEBs, poor development of cranial aspect of gland 4 (asymmetric)                                                                                         |
|           | 2     | Gland almost reaches the lymph node (LN) (retarded growth), little branching or budding, few TEBs, poor development of cranial aspect of gland 4                                                                                          |
|           | 3     | Gland touches LN, moderate branching and budding, external TEBs begin to appear around periphery, moderate development of cranial aspect of gland 4                                                                                       |
|           | 4     | Gland touches LN, wide with equal antral and dorsal development (symmetric), internal and external TEBs, excellent branching and budding throughout gland, symmetric                                                                      |
|           | 5     | Excessive lateral growth, gland has grown past LN, dense budding with few gaps, internal and external TEBs, external TEBs around entire periphery                                                                                         |
|           | 6     | Excessive lateral growth, growth beyond LN, 4th and 5th gland have grown together, dense budding with very few gaps, fewer TEBs because they are beginning to differentiate into lobules (looks like typical development on PND 35 or 50) |
|           | 7     | Excessive lateral growth, gland has reached ends of fat pads and are terminally differentiating into lobules, 4th and 5th glands have grown over each other, very dense, difficult to see ducts (looks like young adult gland)            |
| 90        | 1     | Small gland that fails to fill fat pad, moderate number of TEBs remain, moderate branching and budding with large gaps, minimal to no lobules L1, poor left side development of 4 <sup>th</sup> gland (asymmetry)                         |
|           | 2     | Small to medium gland growth, with several TEB remaining, moderate branching and budding, asymmetry remains, many lobules L1                                                                                                              |
|           | 3     | Medium sized gland with fair branching and growth, some TEBs, moderate budding with some gaps, small lobules L1-2. There is still some asymmetry of development                                                                           |
|           | 4     | Growth extends in both directions without reaching ends of fat pad, asymmetry is absent, gaps are evident, but branching and budding are moderate, more lobules L1-2 present                                                              |
|           | 5     | Large gland almost reaching end of fat pad, few TEBs remain, dense branching, moderate budding with some gaps, many lobules L2-3                                                                                                          |
|           | 6     | Gland extended to ends of fat pad nearly everywhere, dense branching, few TEB remnants remain, budding throughout branches, developed lobules L3, some gaps remain                                                                        |
|           | 7     | Gland has reached ends of fat pad, terminally differentiated with no external or internal TEBs, dense branching and budding, no gaps, developed lobules L2-4, hard to see ducts                                                           |

Notes: PND=Postnatal Day, TEBs=Terminal End Buds, LN=Lymph Node, L=Lobule stage  
Lobule stage defined in Russo IH and Russo J. 1996. *Environ Health Perspect* 104:938-967.

**Table S2.** Features measured by the automatic method applied to PND 21 mammary glands and complementary quantities used jointly in PCA and other analyses.

| Type of analysis performed                        | Feature Label                                                                                                    | Explanation of Feature Label                                                                                                    |
|---------------------------------------------------|------------------------------------------------------------------------------------------------------------------|---------------------------------------------------------------------------------------------------------------------------------|
| Weights                                           | Necropsy Weight (g)                                                                                              | Body weight at necropsy (grams)                                                                                                 |
|                                                   | Mammary Gland Weight (mg)                                                                                        | Weight of mammary gland (milligrams)                                                                                            |
| Manual assessment                                 | TEB                                                                                                              | Number of terminal end buds                                                                                                     |
| Analyses of the 2D projection of the mammary tree | Area ( $\mu\text{m}^2$ )                                                                                         | Surface of 2D projection (square micrometers)                                                                                   |
|                                                   | Major ( $\mu\text{m}$ )                                                                                          | Size of the major axis of the gland (micrometers)                                                                               |
|                                                   | Minor ( $\mu\text{m}$ )                                                                                          | Size of the minor axis of the gland (micrometers)                                                                               |
|                                                   | Feret ( $\mu\text{m}$ )                                                                                          | Feret diameter (micrometers)                                                                                                    |
|                                                   | AR                                                                                                               | Aspect ratio of the gland                                                                                                       |
|                                                   | Round                                                                                                            | Roundness (inverse aspect ratio)                                                                                                |
|                                                   | Fractal Dimension                                                                                                | Self-explanatory (higher for denser glands, lower for sparse glands)                                                            |
|                                                   | Extension LV ( $\mu\text{m}$ )                                                                                   | Farthest distance from the lymph vessels (LV); negative when it is not reached (micrometers)                                    |
|                                                   | Vesselp                                                                                                          | Proportion of the gland beyond a specific lymph vessel                                                                          |
|                                                   | Nodep                                                                                                            | Proportion beyond the lymph node                                                                                                |
|                                                   | Global analyses in 3D                                                                                            | Width ( $\mu\text{m}$ )                                                                                                         |
| Height ( $\mu\text{m}$ )                          |                                                                                                                  | Height of the gland along its main directions (micrometers)                                                                     |
| Depth ( $\mu\text{m}$ )                           |                                                                                                                  | Depth of the gland along its main directions (micrometers)                                                                      |
| Vol ( $\mu\text{m}^3$ )                           |                                                                                                                  | Raw volume of epithelium (cubic micrometers)                                                                                    |
| SA ( $\mu\text{m}^2$ )                            |                                                                                                                  | Surface of the epithelium (i.e., surface the boundary epithelium/stroma) (square micrometers)                                   |
| Solidity 3D ( $\mu\text{m}^3$ )                   |                                                                                                                  | Volume / convex volume (cubic micrometers)                                                                                      |
| Encl Vol ( $\mu\text{m}^3$ )                      |                                                                                                                  | Volume with some corrections (cubic micrometers)                                                                                |
| I1                                                |                                                                                                                  | Momentum of inertia along axis 1                                                                                                |
| I2                                                |                                                                                                                  | Momentum of inertia along axis 2                                                                                                |
| I3                                                |                                                                                                                  | Momentum of inertia along axis 3                                                                                                |
| Euler                                             |                                                                                                                  | Assessment of Euler characteristic, which provides information on the lack of convexity of the object                           |
| Holes                                             |                                                                                                                  | Number of topological holes.                                                                                                    |
| Thickness ( $\mu\text{m}$ )                       |                                                                                                                  | Average local thickness of the gland (estimates the diameter, but biased by the compression exerted on the gland) (micrometers) |
| SD Thickness ( $\mu\text{m}$ )                    |                                                                                                                  | Average local thickness of the gland (estimates the diameter, but biased by the compression exerted on the gland) (micrometers) |
| Max Thickness ( $\mu\text{m}$ )                   |                                                                                                                  | Average local thickness of the gland (estimates the diameter, but biased by the compression exerted on the gland) (micrometers) |
| Dimension 3D                                      | Fractal dimension in 3D - high if the gland fills space in 3 dimension (thick, no lacunarity, high budding, ...) |                                                                                                                                 |
| Direct skeleton analysis (raw)                    | X Branches                                                                                                       | Number of branches                                                                                                              |
|                                                   | X Junctions                                                                                                      | Number of junctions                                                                                                             |
|                                                   | X Junction Voxels                                                                                                | Number of junction voxels                                                                                                       |
|                                                   | Average Branch Length ( $\mu\text{m}$ )                                                                          | Branch length (micrometers)                                                                                                     |

|                                                                                                                                                                          |                                          |                                                                                                                      |                                  |
|--------------------------------------------------------------------------------------------------------------------------------------------------------------------------|------------------------------------------|----------------------------------------------------------------------------------------------------------------------|----------------------------------|
|                                                                                                                                                                          | X Triple Points                          | Number of bifurcation                                                                                                |                                  |
|                                                                                                                                                                          | X Quadruple Points                       | Number of triple branching                                                                                           |                                  |
|                                                                                                                                                                          | Maximum Branch Length ( $\mu\text{m}$ )  | Maximum branch length (micrometers)                                                                                  |                                  |
| Direct skeleton analysis after pruning                                                                                                                                   | X Branches1                              | Number of branches (only for non-terminal branches)                                                                  |                                  |
|                                                                                                                                                                          | X Junctions1                             | Number of junctions (only for non-terminal branches)                                                                 |                                  |
|                                                                                                                                                                          | X Junction Voxels1                       | Number of junction voxels (only for non-terminal branches)                                                           |                                  |
|                                                                                                                                                                          | X Slab Voxels1                           | Number of voxels (only for non-terminal branches)                                                                    |                                  |
|                                                                                                                                                                          | Average Branch Length1 ( $\mu\text{m}$ ) | Branch Length (micrometers) (only for non-terminal branches)                                                         |                                  |
|                                                                                                                                                                          | X Triple Points1                         | Number of bifurcation (only for non-terminal branches)                                                               |                                  |
|                                                                                                                                                                          | X Quadruple Points1                      | Number of triple branching (only for non-terminal branches)                                                          |                                  |
|                                                                                                                                                                          | Maximum Branch Length1 ( $\mu\text{m}$ ) | Maximum branch length (micrometers) (only for non-terminal branches)                                                 |                                  |
| Specialized analysis. When quantities are defined per branch the average over all branches is reported. All branches larger than $20\mu\text{m}$ are taken into account. | Size ( $\mu\text{m}$ )                   | Length of branch (micrometers)                                                                                       |                                  |
|                                                                                                                                                                          | Number of Neighbors                      | Number of disregarded connections                                                                                    |                                  |
|                                                                                                                                                                          | Depth from Root                          | Number of bifurcation from the nipple to the branch                                                                  |                                  |
|                                                                                                                                                                          | Depth Subtree ( $\mu\text{m}$ )          | Average depth of the subtree of each branch (micrometers)                                                            |                                  |
|                                                                                                                                                                          | Number of Children                       | Average number of sub branches                                                                                       |                                  |
|                                                                                                                                                                          | Euclidean Distance ( $\mu\text{m}$ )     | Distance between beginning and end of each branch (micrometers)                                                      |                                  |
|                                                                                                                                                                          | Tortuosity                               | Ratio: length of branches /Euclidean distance                                                                        |                                  |
|                                                                                                                                                                          | Angle Between Beginning and End          | Angle between beginning and end of a branch                                                                          |                                  |
|                                                                                                                                                                          | Angle with Parent Local                  | Angle between the end of the parent branch and the beginning the branch                                              |                                  |
|                                                                                                                                                                          | Angle with Parent Global                 | Angle between the direction of the parent branch and the branch                                                      |                                  |
|                                                                                                                                                                          | Angle Wr Main Dir                        | Angle between the direction of the branch and the average direction of all branches                                  |                                  |
|                                                                                                                                                                          | Length to Nipple ( $\mu\text{m}$ )       | Distance in the tree between a branch and the nipple (micrometers)                                                   |                                  |
|                                                                                                                                                                          | Mean Width ( $\mu\text{m}$ )             | Mean distance map of the branch without the z axis (i.e., 2D width of the branch) (micrometers)                      |                                  |
|                                                                                                                                                                          | Max Width ( $\mu\text{m}$ )              | Max distance map of the branch without the z axis (i.e., 2D width of the branch) (micrometers)                       |                                  |
|                                                                                                                                                                          | SD Width ( $\mu\text{m}$ )               | Standard deviation of the distance map of the branch without the z axis (i.e., 2D width of the branch) (micrometers) |                                  |
|                                                                                                                                                                          | Mean Width2 ( $\mu\text{m}$ )            | Mean local thickness of the branch (micrometers)                                                                     |                                  |
|                                                                                                                                                                          | Max Width2 ( $\mu\text{m}$ )             | Max local thickness of the branch (micrometers)                                                                      |                                  |
|                                                                                                                                                                          | SD Width2 ( $\mu\text{m}$ )              | Standard deviation of the local thickness of the branch (micrometers)                                                |                                  |
|                                                                                                                                                                          | Length Farthest Leaf ( $\mu\text{m}$ )   | Distance in the tree between a branch and farthest leaf (micrometers)                                                |                                  |
|                                                                                                                                                                          | Topodepth                                | Total depth (number of bifurcation from nipple to the farthest branch)                                               |                                  |
|                                                                                                                                                                          | Nblarge                                  | Putative bud clusters (structures with a wide end)                                                                   |                                  |
|                                                                                                                                                                          | Secondary Bud                            | Putative number of budding from ducts                                                                                |                                  |
|                                                                                                                                                                          | Nbranchestree                            | Number of branches                                                                                                   |                                  |
|                                                                                                                                                                          | Type1 (%)                                | Percent secondary bifurcation                                                                                        |                                  |
|                                                                                                                                                                          | Type2 (%)                                | Percent subbranches of secondary bifurcations                                                                        |                                  |
|                                                                                                                                                                          | Specialized analysis.                    | Size1 ( $\mu\text{m}$ )                                                                                              | Length of branches (micrometers) |

|                                                                                                                                          |                                  |                                                                                                                      |
|------------------------------------------------------------------------------------------------------------------------------------------|----------------------------------|----------------------------------------------------------------------------------------------------------------------|
| When quantities are defined per branch the average over all branches is reported. Only branches larger than 75µm are taken into account. | Number of Neighbours1            | Number of disregarded connections                                                                                    |
|                                                                                                                                          | Depth from Root1                 | Number of bifurcation from the nipple to the branch                                                                  |
|                                                                                                                                          | Depth Subtree1 (µm)              | Average depth of the subtree of each branch (micrometers)                                                            |
|                                                                                                                                          | Number of Children1              | Average number of sub branches                                                                                       |
|                                                                                                                                          | Euclidean Distance1 (µm)         | Distance between beginning and end of each branch (micrometers)                                                      |
|                                                                                                                                          | Tortuosity1                      | Ratio: length of branches /Euclidean distance                                                                        |
|                                                                                                                                          | Angle Between Beginning and End1 | Angle between beginning and end of a branch                                                                          |
|                                                                                                                                          | Angle with Parent Local1         | Angle between the end of the parent branch and the beginning the branch                                              |
|                                                                                                                                          | Angle with Parent Global1        | Angle between the direction of the parent branch and the branch                                                      |
|                                                                                                                                          | Angle Wr Main Dir1               | Angle between the direction of the branch and the average direction of all branches                                  |
|                                                                                                                                          | Length to Nipple1 (µm)           | Distance in the tree between a branch and the nipple (micrometers)                                                   |
|                                                                                                                                          | Mean Width1 (µm)                 | Mean distance map of the branch without the z axis (i.e., 2D width of the branch) (micrometers)                      |
|                                                                                                                                          | Max Width1 (µm)                  | Max distance map of the branch without the z axis (i.e., 2D width of the branch) (micrometers)                       |
|                                                                                                                                          | SD Width1 (µm)                   | Standard deviation of the distance map of the branch without the z axis (i.e., 2D width of the branch) (micrometers) |
|                                                                                                                                          | Mean Width2.1 (µm)               | Mean local thickness of the branch (micrometers)                                                                     |
|                                                                                                                                          | Max Width2.1 (µm)                | Max local thickness of the branch (micrometers)                                                                      |
|                                                                                                                                          | SD Width2.1 (µm)                 | Standard deviation of the local thickness of the branch (micrometers)                                                |
|                                                                                                                                          | Length Farthest Leaf1 (µm)       | Distance in the tree between a branch and farthest leaf (micrometers)                                                |
|                                                                                                                                          | Topodepth1                       | Total depth (number of bifurcation from nipple to the farthest branch)                                               |
|                                                                                                                                          | Nblarge1                         | Putative bud clusters (structures with a wide end)                                                                   |
|                                                                                                                                          | Secondary Bud1                   | Putative number of budding from ducts                                                                                |
|                                                                                                                                          | Nbranchestree1                   | Number of branches                                                                                                   |
|                                                                                                                                          | Type1.1 (%)                      | Percent secondary bifurcation                                                                                        |
|                                                                                                                                          | Type2.1 (%)                      | Percent subbranches of secondary bifurcations                                                                        |

The table briefly describes the 91 structural features of mammary glands resulting from the automated method and three features assessed manually: animal weight, mammary gland weight and number of TEBs, represented in the top of the table. The left column provides a general description of the type of measurement, the “feature label” column refers to the way the feature is referred to in the text, and the “explanation of the feature label” column provides a succinct description of the feature. These features were used for the global analyses.

**Table S3.** Comparison of the test variable in the data,  $X_{\text{observed}}$ , and the statistics resulting from the permutation test for different values of the criteria A and B with datasets PND90CD, PND90SD, 6MCD and 6MSD.

| Criterion         | $X_{\text{observed}}$ | 95 % of $X_{\text{sim}} <$ | 99 % of $X_{\text{sim}} <$ | 99.5% of $X_{\text{sim}} <$ | $P_{\text{estimated}}$ |
|-------------------|-----------------------|----------------------------|----------------------------|-----------------------------|------------------------|
| A(1)=no threshold | 1.43                  | 1.08                       | 1.24                       | 1.29                        | 0.00085***             |
| A(1.05)           | 1.43                  | 1.08                       | 1.24                       | 1.30                        | 0.00091***             |
| A(1.1)            | 1.49                  | 1.09                       | 1.26                       | 1.32                        | 0.00064***             |
| A(1.2)            | 1.67                  | 1.13                       | 1.31                       | 1.38                        | 0.00016***             |
| A(1.3)            | 1.66                  | 1.15                       | 1.34                       | 1.41                        | 0.00029***             |
| A(1.4)            | 1.73                  | 1.16                       | 1.36                       | 1.44                        | 0.00026***             |
| A(1.5)            | 1.93                  | 1.17                       | 1.32                       | 1.45                        | 2.2e-05***             |
| A(1.75)           | 1.83                  | 1.21                       | 1.44                       | 1.53                        | 0.00029***             |
| A(2)              | 1.55                  | 1.23                       | 1.47                       | 1.56                        | 0.0055**               |
| A(2.5)            | 1.29                  | 1.27                       | 1.52                       | 1.61                        | 0.044*                 |
| B(1)=no threshold | 1.24                  | 1.11                       | 1.27                       | 1.33                        | 0.014*                 |
| B(0.75)           | 1.25                  | 1.10                       | 1.27                       | 1.33                        | 0.012*                 |
| B(0.6)            | 1.29                  | 1.11                       | 1.28                       | 1.34                        | 0.0086**               |
| B(0.5)            | 1.37                  | 1.12                       | 1.29                       | 1.35                        | 0.0038***              |
| B(0.4)            | 1.36                  | 1.14                       | 1.32                       | 1.39                        | 0.0066**               |
| B(0.3)            | 1.16                  | 1.20                       | 1.40                       | 1.48                        | 0.061                  |
| B(0.2)            | 1.31                  | 1.26                       | 1.50                       | 1.59                        | 0.037*                 |
| B(0.1)            | 1.41                  | 1.47                       | 1.81                       | 1.95                        | 0.060                  |

**Note:** X is the test variable defined in the main text.  $X_{\text{observed}}$ , is the value of X observed in the data.  $X_{\text{sim}}$  is the distribution of X generated by the permutation test, under the  $H_0$  hypothesis that all conditions are equivalent.  $P_{\text{estimated}}$  is the p-value estimated for  $X_{\text{observed}}$  on the basis of  $X_{\text{sim}}$ . Number of animals per group n=8-10. Number of groups: 6.



**Table S4.** Mean and standard deviation of conditions compared in the main text, in PND90CD, PND90SD, 6MCD and 6MSD. Number of animals per group n=8-10.

| Dataset | Quantity                                    | Control     | 250BPA       | 0.5EE2     |
|---------|---------------------------------------------|-------------|--------------|------------|
| PND90CD | Average gland density                       | 32.0 ± 14.1 | 18.1 ± 9.4   | 22.4 ± 7.0 |
| PND90CD | Density in the rostral area (area 1)        | 36.6 ± 19.4 | 16.8 ± 12.03 | 28.6 ± 10  |
| PND90CD | density in the middle of the gland (area 2) | 27.1 ± 14.2 | 5.4 ± 17.6   | 11.9 ± 8.6 |
| PND90CD | Lobuloalveolar budding                      | 0.1 ± 0.32  | 0.9 ± 0.57   | 0.7 ± 0.67 |
| PND90SD | lateral budding                             | 1.3 ± 0.68  | 1.9 ± 0.57   | 2.4 ± 0.70 |
| 6MCD    | fat pad area cm <sup>2</sup>                | 41.1 ± 6.4  | 47.31 ± 5.4  | 44.2 ± 4.7 |
| 6MCD    | percent coverage                            | 52.2 ± 4.7  | 47.1 ± 4.5   | 57.4 ± 9.9 |
| 6MSD    | standard deviation of gland density         | 6.58 ± 3.2  | 14.0 ± 7.3   | 8.2 ± 5.8  |
| 6MSD    | percent coverage                            | 52.4 ± 7.5  | 45.8 ± 4.9   | 53.2 ± 3.8 |
| 6MSD    | Lateral branching                           | 2.6 ± 0.52  | 2.0 ± 0      | 2.4 ± 0.52 |
| 6MSD    | Lateral budding                             | 1.6 ± 0.70  | 1.0 ± 0.47   | 1.8 ± 0.42 |
| 6MSD    | alveolar budding                            | 1.5 ± 0.85  | 0.6 ± 0.84   | 1.7 ± 0.82 |

**Note:** Control: vehicle control, EE2: ethinyl estradiol, BPA: bisphenol A. Units: µg /kg body weight (bw)/day.

**Table S5.** Incidence of benign and malignant lesions/tumors identified from A) PND 90 and B) 6-month mammary glands following either continuous or stop-dose exposures across all treatment groups.

**A**

**PND 90 Continuous Dose (PND90CD)**

| Treatment | Animals (n) | Lobular Hyperplasia | Fibroadenoma | Periductular Fibrosis (± lymphocytic infiltration) | Ductal epithelial necrosis with inflammatory infiltrate | DCIS |
|-----------|-------------|---------------------|--------------|----------------------------------------------------|---------------------------------------------------------|------|
| Control   | 10          | 0                   | 0            | 0                                                  | 0                                                       | 0    |
| 2.5BPA    | 9           | 0                   | 0            | 0                                                  | 0                                                       | 0    |
| 25BPA     | 10          | 0                   | 0            | 1                                                  | 0                                                       | 0    |
| 250BPA    | 9           | 0                   | 0            | 0                                                  | 0                                                       | 0    |
| 2500BPA   | 9           | 0                   | 0            | 0                                                  | 0                                                       | 0    |
| 25000BPA  | 10          | 0                   | 0            | 1                                                  | 1                                                       | 0    |
| 0.05EE2   | 10          | 0                   | 0            | 0                                                  | 0                                                       | 0    |
| 0.5EE2    | 10          | 0                   | 0            | 0                                                  | 0                                                       | 1    |

**PND 90 Stop Dose (PND90SD)**

| Treatment | Animals (n) | Lobular Hyperplasia | Fibroadenoma | Periductular Fibrosis (± lymphocytic infiltration) | Ductal epithelial necrosis with inflammatory infiltrate | DCIS |
|-----------|-------------|---------------------|--------------|----------------------------------------------------|---------------------------------------------------------|------|
| Control   | 10          | 0                   | 0            | 0                                                  | 0                                                       | 0    |
| 2.5BPA    | 8           | 0                   | 0            | 0                                                  | 0                                                       | 0    |
| 25BPA     | 10          | 0                   | 0            | 1                                                  | 0                                                       | 0    |
| 250BPA    | 10          | 0                   | 0            | 0                                                  | 0                                                       | 2    |
| 2500BPA   | 8           | 0                   | 0            | 0                                                  | 0                                                       | 0    |
| 25000BPA  | 10          | 0                   | 0            | 0                                                  | 0                                                       | 0    |
| 0.05EE2   | 9           | 1                   | 1            | 0                                                  | 0                                                       | 0    |
| 0.5EE2    | 10          | 0                   | 0            | 0                                                  | 0                                                       | 0    |

**B****6 Month Continuous Dose (6MCD)**

| Treatment | Animals (n) | Lobulo/Ductular-alveolar dilatation ( $\pm$ secretions) | Periductular Fibrosis ( $\pm$ lymphocytic infiltration) | Fibroadenoma | Adenoma | Adenocarcinoma ( $\pm$ cyst) |
|-----------|-------------|---------------------------------------------------------|---------------------------------------------------------|--------------|---------|------------------------------|
| Control   | 10          | 0                                                       | 1                                                       | 0            | 0       | 0                            |
| 2.5BPA    | 10          | 0                                                       | 0                                                       | 1            | 0       | 0                            |
| 25BPA     | 10          | 0                                                       | 0                                                       | 1            | 0       | 0                            |
| 250BPA    | 10          | 0                                                       | 0                                                       | 0            | 0       | 0                            |
| 2500BPA   | 10          | 0                                                       | 0                                                       | 0            | 0       | 0                            |
| 25000BPA  | 10          | 0                                                       | 0                                                       | 0            | 0       | 0                            |
| 0.05EE2   | 10          | 0                                                       | 0                                                       | 0            | 0       | 0                            |
| 0.5EE2    | 10          | 4                                                       | 0                                                       | 2            | 3       | 1                            |

**6 Month Stop Dose (6MSD)**

| Treatment | Animals (n) | Lobulo/Ductular-alveolar dilatation ( $\pm$ secretions) | Periductular Fibrosis ( $\pm$ lymphocytic infiltration) | Fibroadenoma | Adenoma | Adenocarcinoma ( $\pm$ cyst) |
|-----------|-------------|---------------------------------------------------------|---------------------------------------------------------|--------------|---------|------------------------------|
| Control   | 10          | 0                                                       | 0                                                       | 0            | 0       | 0                            |
| 2.5BPA    | 10          | 1                                                       | 0                                                       | 0            | 0       | 0                            |
| 25BPA     | 10          | 0                                                       | 0                                                       | 0            | 0       | 0                            |
| 250BPA    | 10          | 0                                                       | 0                                                       | 0            | 0       | 0                            |
| 2500BPA   | 10          | 0                                                       | 0                                                       | 0            | 0       | 0                            |
| 25000BPA  | 10          | 0                                                       | 1                                                       | 0            | 0       | 0                            |
| 0.05EE2   | 10          | 0                                                       | 0                                                       | 0            | 0       | 0                            |
| 0.5EE2    | 10          | 4                                                       | 1                                                       | 1            | 1       | 2                            |

**Note:** Control: vehicle control, EE2: ethinyl estradiol, BPA: bisphenol A. Units:  $\mu\text{g}$  /kg body weight (bw)/day.

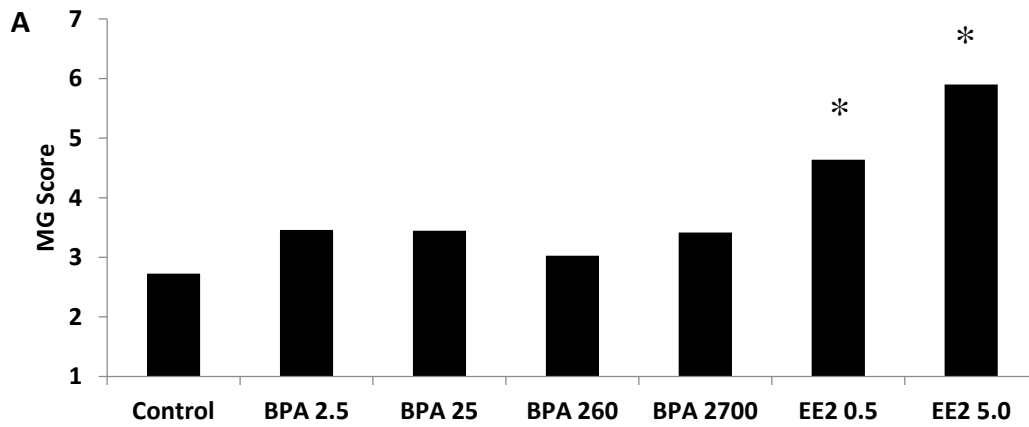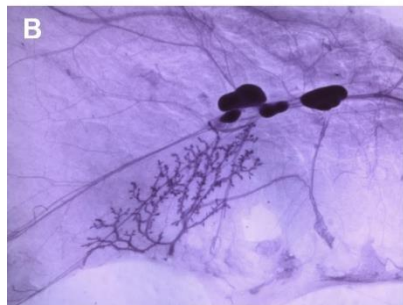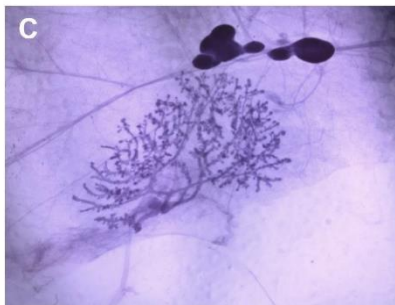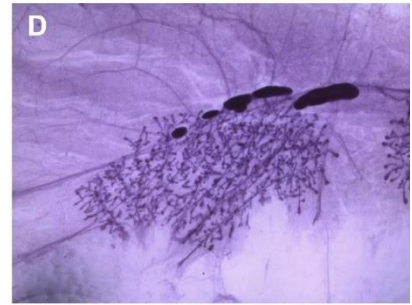

**Figure S1: Scoring evaluation of PND21P mammary glands.** [A] Comparison of the mean semi-quantitative score of all treatment groups. Control: vehicle control, EE2: ethinyl estradiol, BPA: bisphenol A. Units:  $\mu\text{g}/\text{kg}$  body weight (bw)/day. Number of animals per group n=9-12. \* indicates significantly accelerated gland development compared to vehicle controls (Kruskal Wallis;  $p=0.004$  and  $p<0.0001$ ). Images are representative of mammary gland development in [B] PND21P vehicle control group, [C] PND21P EE2 0.5 group, and [D] PND21P EE2 5.0 group.

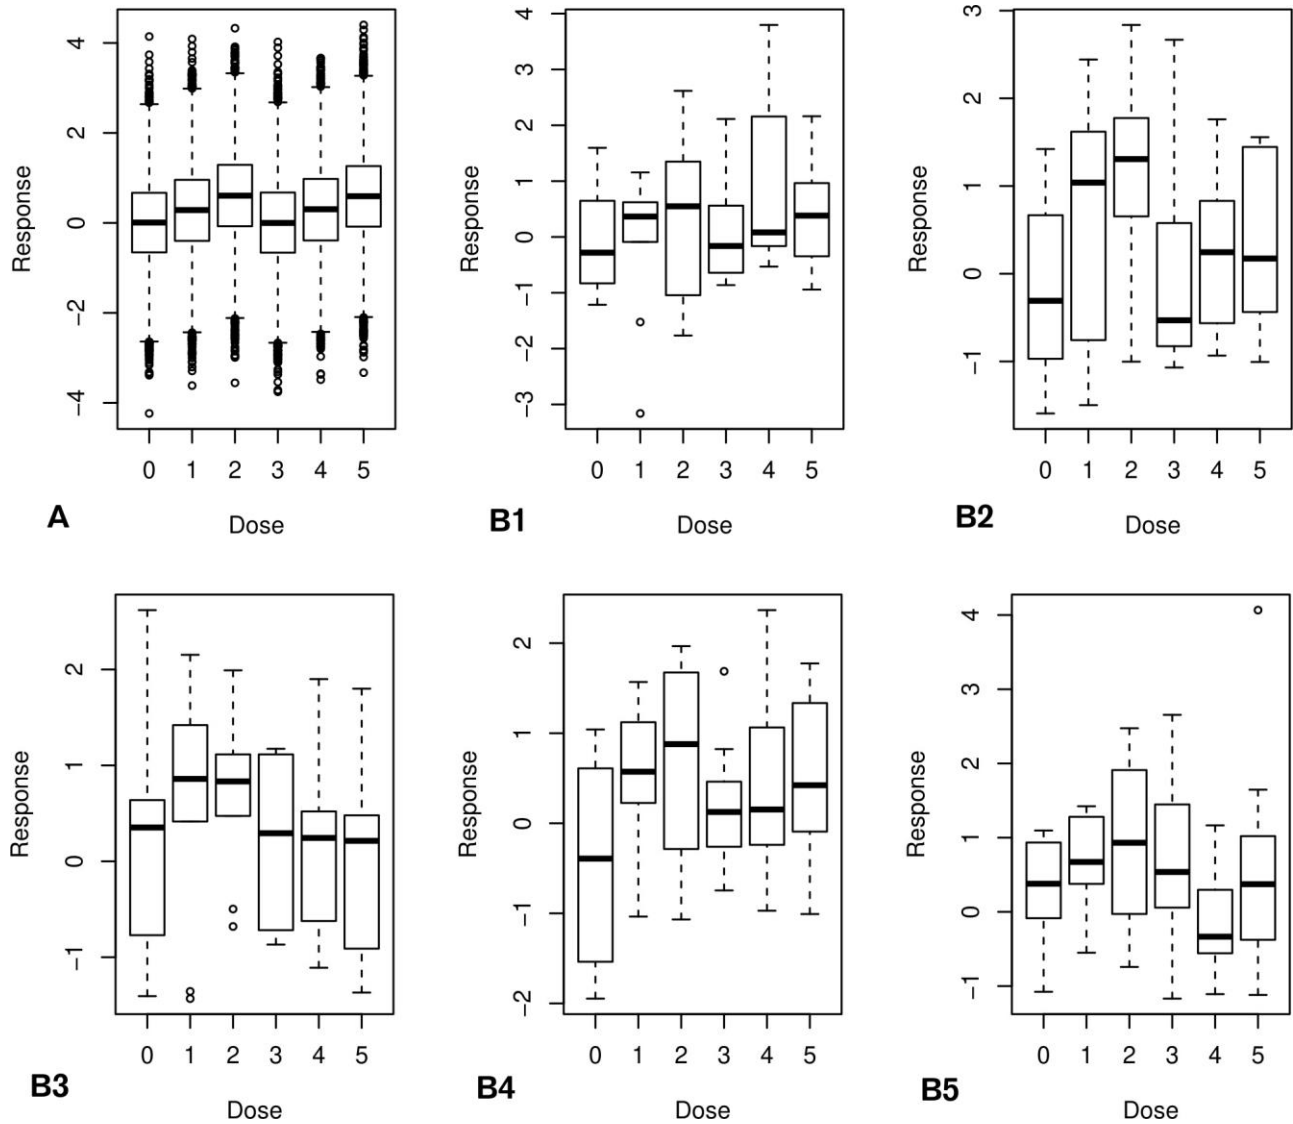

**Figure S2.** *Simulated dose response with  $a=0.6$  (without correlations).* The midline represents the median, the box represents the quartiles above and below the median and the whiskers represent the two other quartiles, excluding outliers. A: We represent a simulation with 10000 “animals” per group to show the shape of our simulated distribution. B: several iterations of our simulated distribution with the usual 10 animal per group.

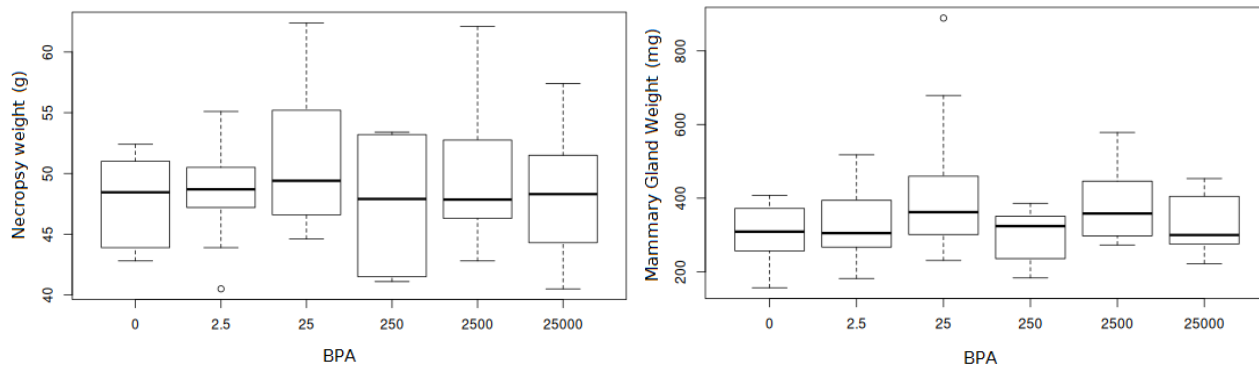

**Figure S3.** Effect of BPA on body weight and on mammary gland weight in PND21C. Control: vehicle control, BPA: bisphenol A. Units:  $\mu\text{g}/\text{kg}$  body weight (bw)/day. The midline represents the median, the box represents the quartiles above and below the median and the whiskers represent the two other quartiles, excluding outliers. Number of animals per group n=8-10.

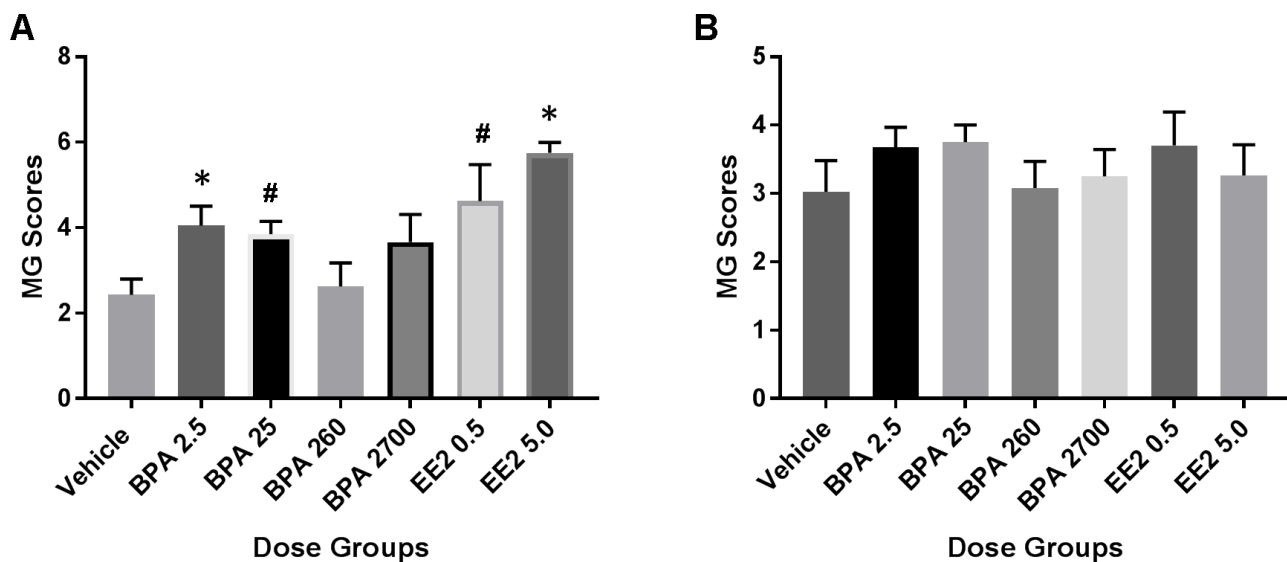

**Figure S4.** Semiquantitative scoring of postnatal day 90 pilot (PND90P) glands. Control: vehicle control, EE2: ethinyl estradiol, BPA: bisphenol A. Units:  $\mu\text{g}/\text{kg}$  body weight (bw)/day. A) PND90P animals from Fenton group in which the majority of animals were in estrus at necropsy (only females in estrus included; n=7, 10, 10, 4, 6, 4, 4; from left to right). \* Indicates significantly accelerated gland development compared to vehicle controls (Kruskal Wallis; BPA 2.5 p=0.05, EE5 p=0.01). # Indicates increased gland proliferation that did not reach significance (Kruskal Wallis; BPA 25 p=0.09, EE0.5 p=0.1). B) PND90P animals that were cycling from both Fenton and Soto groups, with all estrous cycle stages at necropsy included except anestrus (n=12, 18, 14, 10, 12, 12, 15, from left to right). All animals in A were included in B analysis.

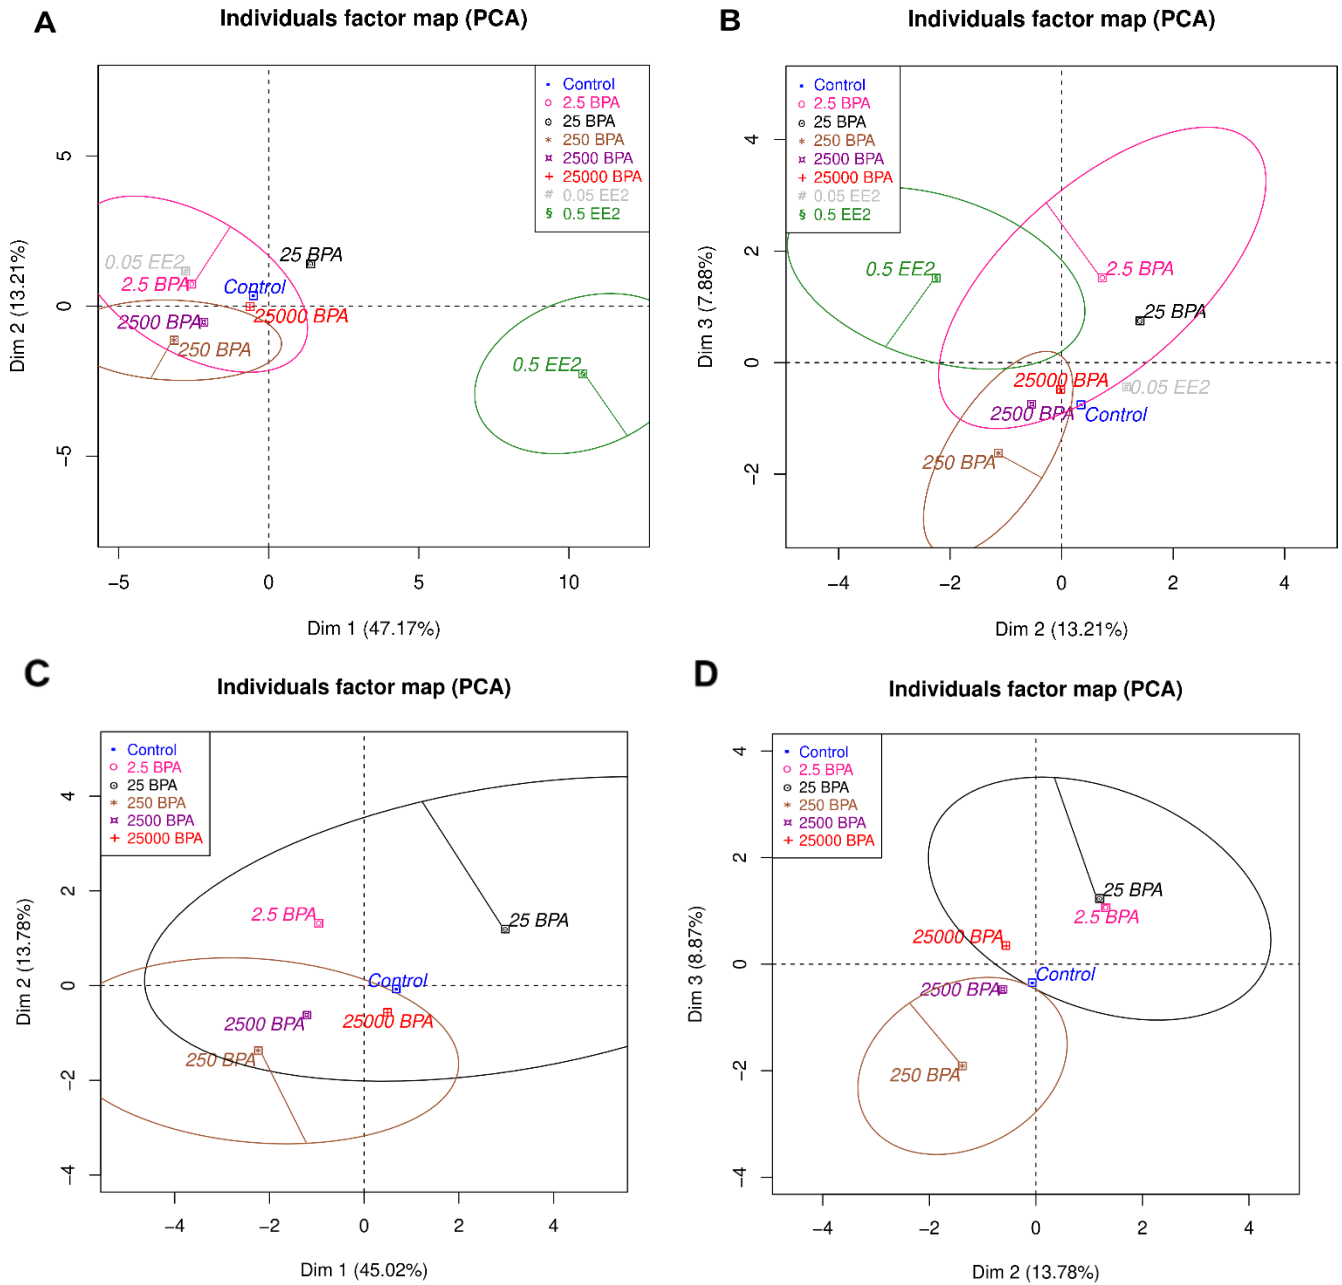

**Figure S5** Dimension 1 to 3 from PCA of PND21C animals with (top) and without (bottom) EE2 treatments. Control: vehicle control, EE2: ethinyl estradiol, BPA: bisphenol A. Units:  $\mu\text{g}/\text{kg}$  body weight (bw)/day. We represent the average of each exposure group. Number of animals per group  $n=8-10$ .

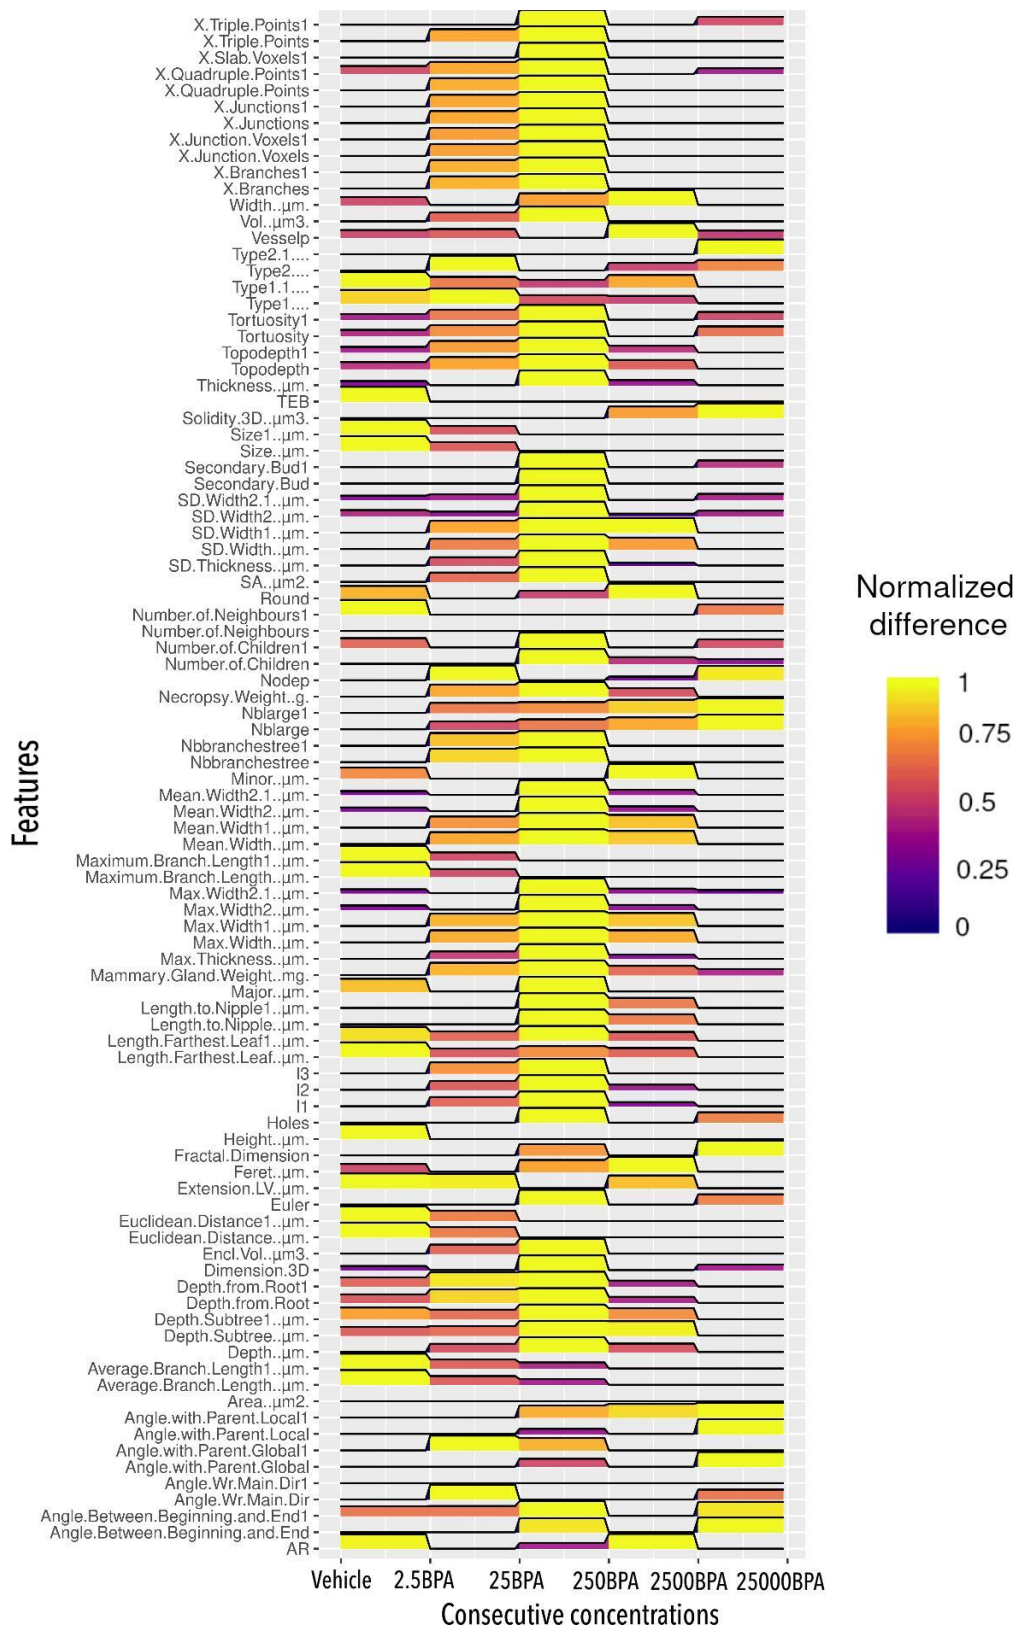

**Figure S6.** Comparison of the changes between consecutive doses for the 94 features in PND21C described in Table S 2. Vehicle: vehicle control, BPA: bisphenol A. Units: µg /kg body weight (bw)/day. Largest consecutive changes meeting criterion B(0.5) for each observed feature in PND21C. All consecutive differences are normalized to a maximum of 1, in yellow. No data means that the criterion B(0.5) is not met for a given feature and consecutive concentration.



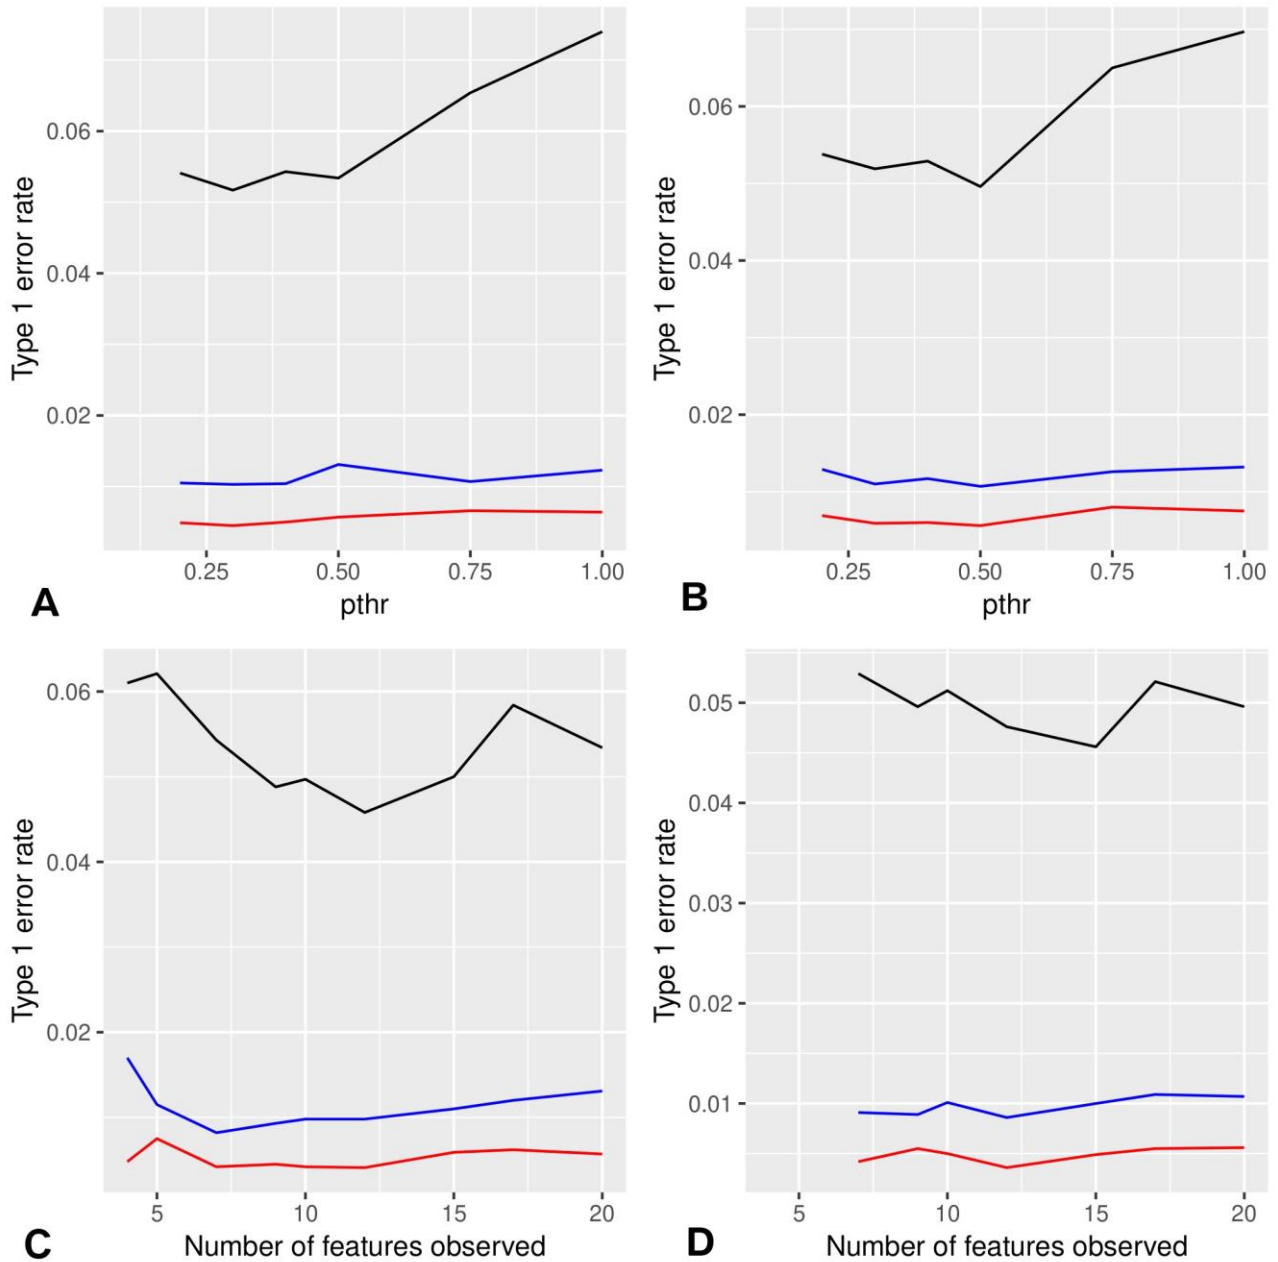

**Figure S7.** Estimated type 1 error rates on data generated by simulation (0.05 in black, 0.01 in blue, 0.005 in red). A, C; the different variables are not correlated by construction. B, D: the different variables are correlated with coefficients stemming from our data. A, B: Type 1 error rate as a function of the threshold for criterion B( $p_{thr}$ ), with 20 variables. C, D: Type 1 error rate as a function of the number of features observed for  $p_{thr}=0.5$ .

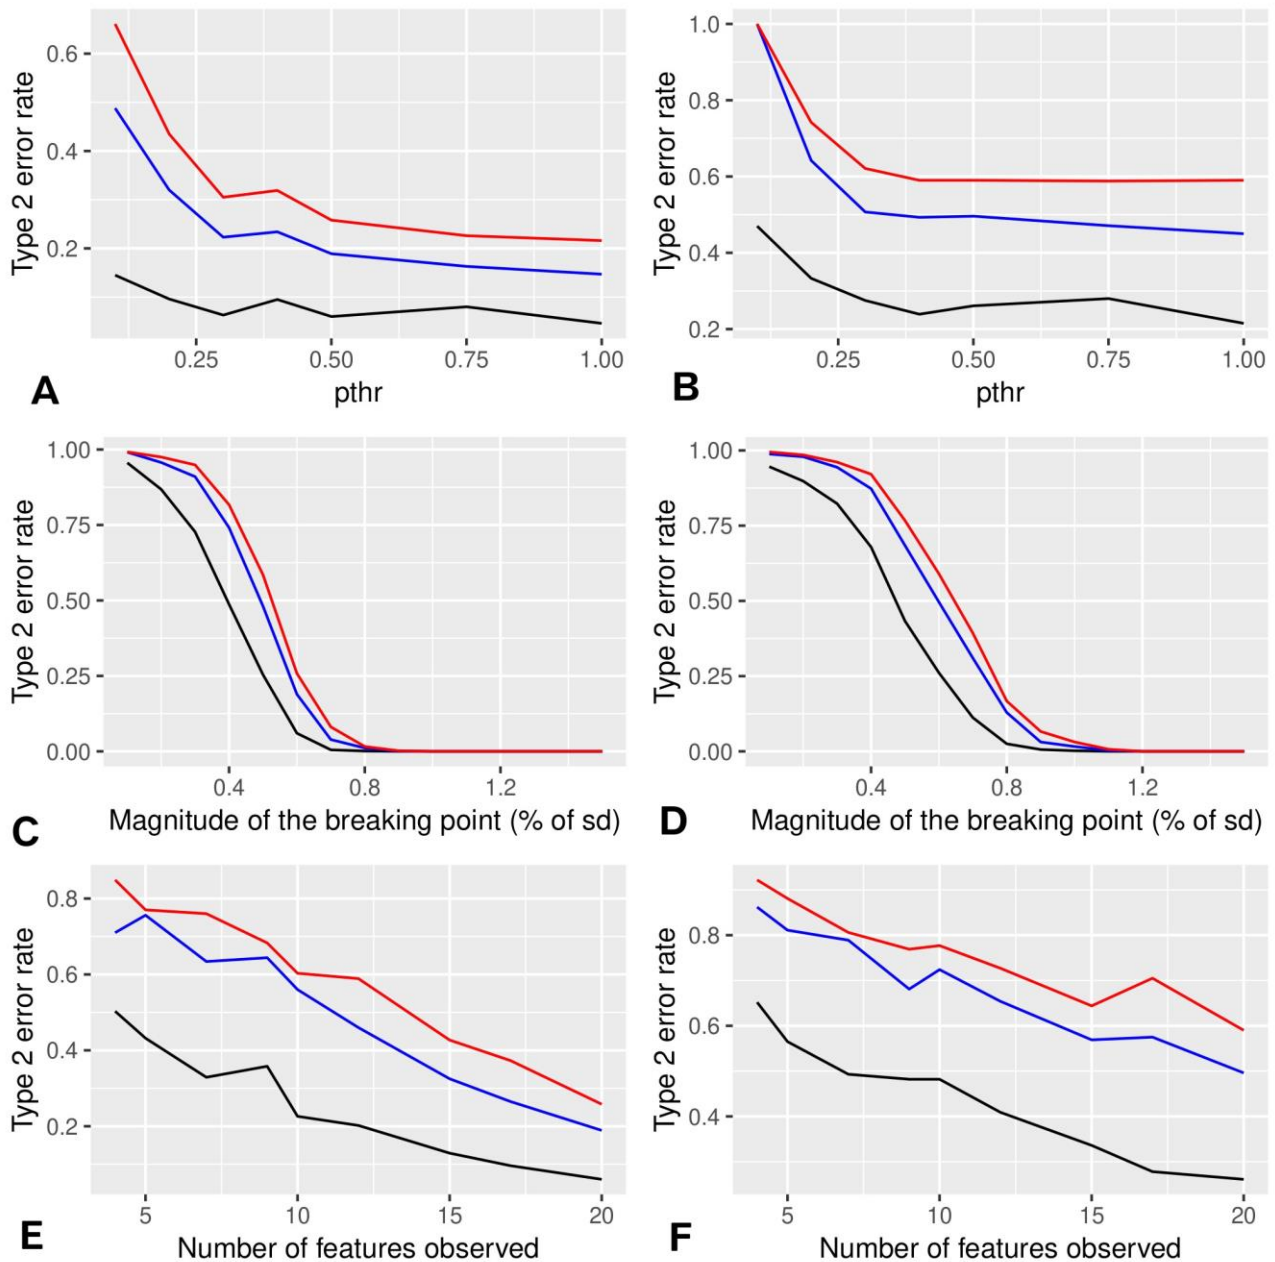

**Figure S8.** Estimated type 2 error rates on data generated by simulation (0.05 in black, 0.01 in blue, 0.005 in red). A, C, E: the different variables are not correlated by construction. B,D,F: the different variables are correlated with coefficients stemming from our data. A, B: type 2 error rate as a function of the threshold for criterion B( $p_{thr}$ ), with 20 variables and  $a=0.6$  which is an intermediate value. C,D: type 2 error rate as a function of  $a$  with  $N=20$ . E, F: type 2 error rate as a function of the number  $N$  of variables describing each individual with  $a=0.6$ , and  $p_{thr}=0.5$ .

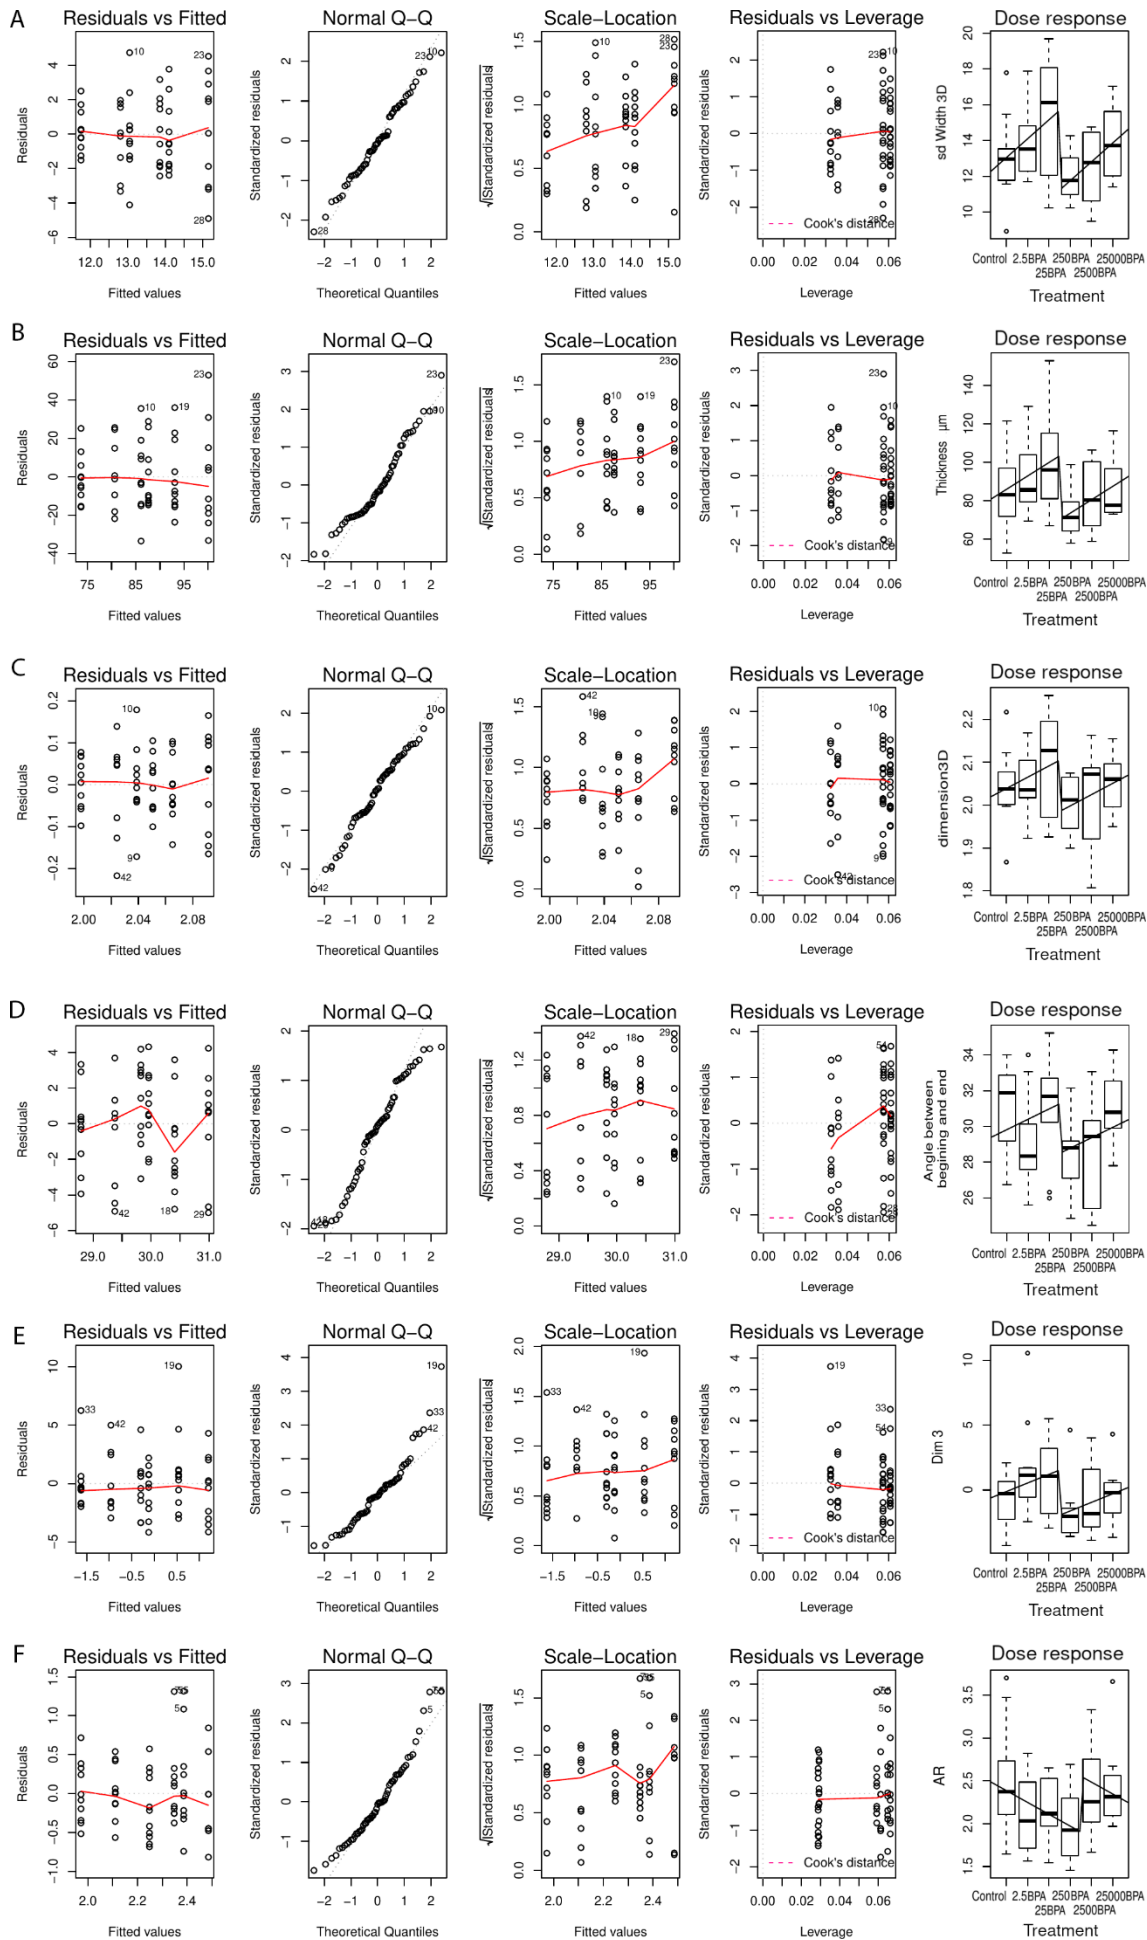

**Figure S9** *Graphical tests to assess the quality of the regressions in PND21 animals.* Control: vehicle control, BPA: bisphenol A. Units:  $\mu\text{g}/\text{kg}$  body weight (bw)/day. The method is provided by the lm method in cran R. The first graph, Residual versus Fitted assesses the presence of a pattern not taken into account by the model and homoscedasticity (i.e., that variance is constant). The second graph assesses the normality of residuals. The third graph is used to assess homoscedasticity. The fourth graph aims at assessing the presence of outliers. Last, the fifth graph displays a box plot of the data and the fitted model. The midline represents the median, the box represents the quartiles above and below the median and the whiskers represent the two other quartiles, excluding outliers. The features represented are A sd width 3D, B Thickness, C Fractal dimension in 3D, D Angle between beginning and end (here, the pattern does not fit the model completely), E Dim.3 resulting from PCA and F Aspect ratio.

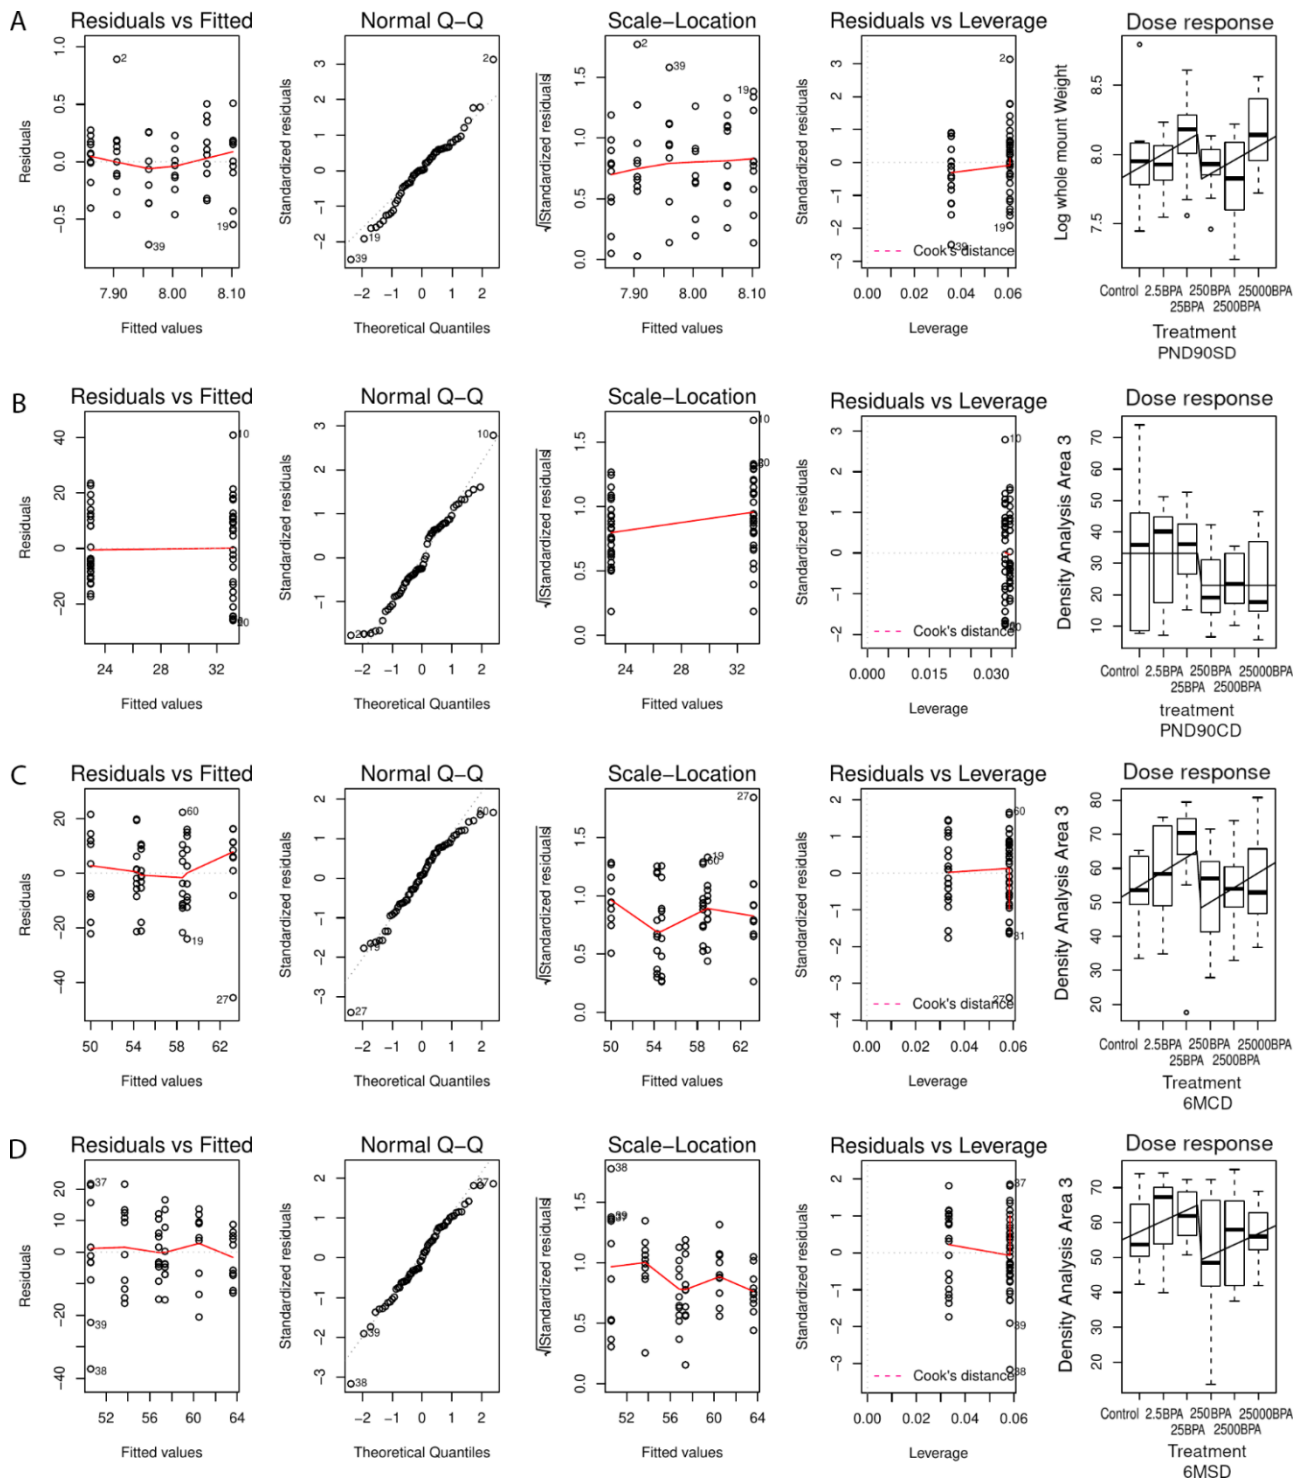

**Figure S10.** Graphical tests to assess the quality of the regressions in 90 day and 6 month animals. The method is provided by the `lm` method in cran R. The first graph, Residual versus Fitted, assesses the presence of a pattern not taken into account by the model and homoscedasticity (i.e., that variance is constant). The second graph assesses the normality of residuals. The third graph is used to assess homoscedasticity. The fourth graph aims at assessing the presence of outliers. Last, the fifth graph displays a box plot of the data and the fitted model. The midline represents the median, the box represents the quartiles above and below the median and the whiskers represent the two other quartiles, excluding outliers. The features represented are A Mammary gland weight in PND90SD, B Density in area 3 in PND90CD, C Density in area 3 in 6MCD and D Density in area 3 in 6MSD.
